# Supplementary material
Source: publisher figshare collection journal article supplement (https://frontiersin.figshare.com/ndownloader/files/15603629)
Supplement: Supplementary file [file 15603629]

**Table S1:** Sugars, proteins and total matter (%<sub>w/w</sub> initial dry matter) solubilized during enzymatic treatment of the destarched wheat bran by Rovabio Advance.

|                    | <i>0 h<sup>\$</sup></i> | <i>0.25 h</i> | <i>0.5 h</i> | <i>1 h</i> | <i>2 h</i> | <i>6 h</i> |
|--------------------|-------------------------|---------------|--------------|------------|------------|------------|
| Solubilized matter | 0                       | 14.68         | 18.06        | 21.98      | 25.11      | 27.85      |
| Sugars             | 0                       | 11.00         | 14.82        | 18.09      | 17.83      | 18.88      |
| Proteins           | 0                       | 1.63          | 1.37         | 1.75       | 3.63       | 5.58       |
| $\Delta^*$         | 0                       | 2.05          | 1.87         | 2.14       | 3.65       | 3.49       |

\* $\Delta$  is the difference between the solubilized matter and the sum of sugars + proteins in the soluble fraction. The data are from Fig.2.

<sup>\$</sup> As there was some solubilization during the period of homogenisation in the bioreactor before addition of the enzyme, the values measured at time 0h for sugars, proteins and total soluble matter were
